# Supplementary material
Source: ML conference proceedings conference paper supplement (https://openreview.net/forum?id=STQOCn4NqBd)
Supplement: supplementary_material [file attachment]

## APPENDIX

### A Additional Technical Results

**Extra notations.** We let  $\mathbb{B}_r(z)$  denote an open ball of radius  $r$  centered at  $z$ , and let  $\|M\|_F$  denote the Frobenius norm.  $\|\cdot\|_2$  is understood as the spectral norm when it is used with a matrix. Further, for any vector-valued function  $h : \mathbb{R}^{d_\theta} \rightarrow \mathbb{R}^l$  of arbitrary dimensionality  $l$  whose first-order partial derivatives exist, we denote its Jacobian matrix with respect to a variable  $\theta$  by  $\mathbf{J}_\theta(h) \in \mathbb{R}^{l \times d_\theta}$ .

Here we present additional notions and results which we will use for proofs.

**Definition A.1** (Quadratic growth condition). *For each  $\beta^* \in \mathfrak{s}^*(\mathbb{P})$ , there exists a neighborhood  $\mathbb{B}_r(\beta^*)$  with some  $r > 0$  and a positive constant  $\kappa$  such that*

$$\mathcal{L}(\beta) \geq \mathcal{L}(\beta^*) + \kappa \text{dist}(\beta, \mathfrak{s}^*(\mathbb{P}))$$

for all  $\beta \in \mathbb{B}_r(\beta^*)$ .

The above quadratic growth condition is widely used in nonlinear programming and can be ensured by various forms of second order sufficient conditions [e.g., 51]. Next, we provide the following lemma that underpins the construction of our estimator in Section 3.

**Lemma A.1.** *For some fixed functions  $g : \mathcal{Y} \rightarrow \mathbb{R}$  and  $h : \mathcal{X} \rightarrow \mathbb{R}$ , let  $\mu_{g,a} = \mathbb{E}[g(Y) \mid X, A = a]$ , so  $\eta = \{\pi_a, \mu_{g,a}\}$ . For any random variable  $T$ , let*

$$\varphi_a(T; \eta) = \frac{\mathbb{1}(A = a)}{\pi_a(X)} \{T - \mathbb{E}[T \mid X, A]\} + \mathbb{E}[T \mid X, A = a],$$

denote the uncentered efficient influence function for the parameter  $\mathbb{E}\{\mathbb{E}[T \mid X, A = a]\}$ . Also, define our parameter and the corresponding estimator by  $\psi_{g,a} = \mathbb{E}[g(Y^a)h(X)]$  and  $\widehat{\psi}_{g,a} = \mathbb{P}_n\{\varphi_a(g(Y); \widehat{\eta})h(X)\}$ , respectively. If we assume that:

(D1) either i)  $\widehat{\eta}$  are estimated using sample splitting or ii) the function class  $\{\varphi_a(\cdot; \eta) : \eta \in (0, 1)^2 \times \mathbb{R}^2\}$  is Donsker in  $\eta$

(D2)  $\mathbb{P}(\widehat{\pi}_a \in [\epsilon, 1 - \epsilon]) = 1$  for some  $\epsilon > 0$

(D3)  $\|\varphi_a(\cdot; \widehat{\eta}) - \varphi_a(\cdot; \eta)\|_{2, \mathbb{P}} = o_{\mathbb{P}}(1)$ ,

Then we have

$$\|\widehat{\psi}_{g,a} - \psi_{g,a}\|_2 = O_{\mathbb{P}}\left(\|\widehat{\pi}_a - \pi_a\|_{2, \mathbb{P}} \|\widehat{\mu}_{g,a} - \mu_{g,a}\|_{2, \mathbb{P}} + n^{-1/2}\right).$$

If we further assume that

(D4)  $\|\widehat{\psi}_{g,a} - \psi_{g,a}\|_{2, \mathbb{P}} \|\widehat{\mu}_{g,a} - \mu_{g,a}\|_{2, \mathbb{P}} = o_{\mathbb{P}}(n^{-1/2})$ ,

then

$$\sqrt{n}(\widehat{\psi}_{g,a} - \psi_{g,a}) \xrightarrow{d} N\left(0, \text{var}\{\varphi_a(g(Y); \eta)h(X)\}\right), \quad (5)$$

and the estimator  $\widehat{\psi}_{g,a}$  achieves the semiparametric efficiency bound, meaning that there are no regular asymptotically linear estimators that are asymptotically unbiased and with smaller variance<sup>4</sup>.

*Proof.* The proof is indeed very similar to that of the conventional doubly robust estimator for the mean potential outcome, and we only give a brief sketch here.

Let us introduce an operator  $\mathcal{IF} : \psi \rightarrow \varphi$  that maps functionals  $\psi : \mathbb{P} \rightarrow \mathbb{R}$  to their influence functions  $\varphi \in L_2(\mathbb{P})$ . Then it suffices to show that  $\mathcal{IF}(\psi_{g,a}) = \mathcal{IF}(\mathbb{E}[\mu_{g,a}(X)h(X)]) = \varphi_a(g(Y); \eta)h(X)$ . In the derivation of the efficient influence function of the general regression

<sup>4</sup>This is also a local asymptotic minimax lower bound.

function in Section 3.4 of [23], when  $h$  is known and only depends on  $X$ , it is clear to see that pathwise differentiability [23, Equation (6)] still holds when  $h(x)$  is multiplied and thus

$$\begin{aligned}\mathcal{IF}(\mu_{g,a}(x)h(x)) &= \frac{\mathbb{1}(X=x, A=a)}{\mathbb{P}(X=x, A=a)} \{g(Y)h(x) - \mu_{g,a}(x)h(x)\} \\ &= \mathcal{IF}(\mu_{g,a}(X))h(X).\end{aligned}$$

Hence,  $\mathcal{IF}(\mathbb{E}[\mu_{g,a}(X)h(X)]) = \varphi_a(g(Y); \eta)h(X)$ .

Another way to see this is that since the influence function is basically a (pathwise) derivative (i.e., Gateaux derivative) we can think of multiplying by  $h(x)$  as multiplying by a constant, which does not change the form of the original derivative, beyond multiplying by the "constant"  $h(x)$ . We refer the reader to [23] and references therein for more details about the efficient influence function and influence function-based estimators.  $\square$

## B Proofs

For proofs, let us consider the following more general form of stochastic nonlinear programming with deterministic constraints and some finite-dimensional decision variable  $x$  in some compact subset  $\mathcal{S} \in \mathbb{R}^k$ :

$$\begin{array}{ll} \underset{x \in \mathcal{S}}{\text{minimize}} & f(x) \\ \text{subject to} & g_j(x) \leq 0, \quad j = 1, \dots, m \end{array} \quad (\text{P}_{nl}) \qquad \begin{array}{ll} \underset{x \in \mathcal{S}}{\text{minimize}} & \hat{f}(x) \\ \text{subject to} & g_j(x) \leq 0, \quad j = 1, \dots, m. \end{array} \quad (\hat{\text{P}}_{nl})$$

We consider the case that  $f, \hat{f}$  are  $C^1$  functions. In the proofs, the active set  $J_0$  is defined with respect to  $\text{P}_{nl}$ .

### B.1 Proof of Theorem 4.1

**Lemma B.1.** *Let  $\hat{x} \in s^*(\hat{\text{P}}_{nl})$  and assume that  $f$  is twice differentiable with Hessian positive definite. Then under Assumption (B1) we have*

$$\text{dist}(\hat{x}, s^*(\text{P}_{nl})) = O\left(\sup_{x'} \|\nabla_x \hat{f}(x') - \nabla_x f(x')\|\right).$$

*Proof.* Due to the positive definiteness of the Hessian of  $f$ , from the KKT condition at  $x^* \in s^*(\text{P}_{nl})$  with multipliers  $\gamma_j^*$

$$\nabla_x L(x^*, \gamma^*) = \nabla_x f(x^*) + \sum_{j \in J_0(x^*)} \gamma_j^* \nabla_x g_j(x^*) = 0,$$

it follows that the following second order condition holds:

$$d^\top \nabla_x^2 L(x^*, \gamma^*) d > 0 \quad \forall d.$$

Hence, by Still [51, Theorem 2.4] the quadratic growth condition holds at  $x^*$ . Then by Shapiro [47, Lemma 4.1] and the mean value theorem, we have

$$\text{dist}(\hat{x}, s^*(\text{P}_{nl})) \leq \alpha \left( \sup_{x'} \|\nabla_x \hat{f}(x') - \nabla_x f(x')\| \right)$$

for some constant  $\alpha > 0$ , which completes the proof.  $\square$

Now, by the fact that both of the objective functions in (P) and ( $\hat{\text{P}}$ ) are differentiable with respect to  $\beta$ , by Lemma A.1 and B.1, we obtain the result.

## B.2 Proof of Theorem 4.2

**Lemma B.2.** *Assume that  $f$  is twice differentiable whose Hessian is positive definite. Then under Assumption (B1), (B2), if LICQ and SC hold at  $x^*$ , we have*

$$n^{1/2} (\widehat{x} - x^*) \xrightarrow{d} \begin{bmatrix} \nabla_x^2 f(x^*) + \sum_j \gamma_j^* \nabla_x^2 g_j(x^*) & \mathbf{B}(x^*) \\ \mathbf{B}^\top(x^*) & 0 \end{bmatrix}^{-1} \begin{bmatrix} \mathbf{1} \\ \mathbf{0} \end{bmatrix} \Upsilon,$$

where

$$n^{1/2} \left( \nabla_x \widehat{f}(x^*) - \nabla_x f(x^*) \right) \xrightarrow{d} \Upsilon.$$

*Proof.* First consider the following auxiliary parametric program with respect to  $(P_{nl})$  with the parameter vector  $\xi \in \mathbb{R}^k$ .

$$\begin{aligned} & \underset{x \in \mathcal{S}}{\text{minimize}} && f(x) + x^\top \xi \\ & \text{subject to} && g_j(x) \leq 0, \quad j = 1, \dots, m. \end{aligned} \tag{P_\xi}$$

$(P_\xi)$  can be viewed as a perturbed program of  $(P_{nl})$ ; for  $\xi = 0$ ,  $(P_\xi)$  coincides with the program  $(P_{nl})$ . Here, the parameter  $\xi$  will play a role of medium that contain all relevant stochastic information in  $(\widehat{P}_{nl})$  [48]. Let  $\bar{x}(\xi)$  denote the solution of the program  $P_\xi$ . Clearly, we get  $\bar{x}(0) = x^*$ .

We have already shown that  $\widehat{x} \xrightarrow{p} x^*$  at the rate of  $n^{1/2}$  and that the quadratic growth condition holds at  $x^*$  under the given conditions in Theorem 4.1. Further, since the Hessian  $\nabla_x^2 f(x^*)$  is positive definite and LICQ holds at  $x^*$ , the uniform version of the quadratic growth condition also holds at  $\bar{x}(\xi)$  (see Shapiro [48, Assumption A3]). Hence by Shapiro [48, Theorem 3.1], we get

$$\widehat{x} = \bar{x}(\xi) + o_{\mathbb{P}}(n^{-1/2})$$

where

$$\xi = \nabla_x \widehat{f}(x^*) - \nabla_x f(x^*).$$

If  $\bar{x}(\xi)$  is Frechet differentiable at  $\xi = 0$ , we have

$$\bar{x}(\xi) - x^* = D_0 \bar{x}(\xi) + o(\|\xi\|),$$

where the mapping  $D_0 \bar{x} : \mathbb{R}^k \rightarrow \mathbb{R}^k$  is the directional derivative of  $\bar{x}(\cdot)$  at  $\xi = 0$ . Since  $\bar{x}(0) = x^*$ , this leads to

$$n^{1/2} (\widehat{x} - x^*) = D_0 \bar{x}(n^{1/2} \xi) + o_{\mathbb{P}}(1).$$

Now we shall show that such mapping  $D_0 \bar{x}(\cdot)$  exists and is indeed linear. To this end, we will show that  $\bar{x}(\xi)$  is locally totally differentiable at  $\xi = 0$ , followed by applying an appropriate form of the implicit function theorem. Define a vector-valued function  $H \in \mathbb{R}^{(k+m)}$  by

$$H(x, \xi, \gamma) = \begin{pmatrix} \nabla_x f(x) + \sum_j \gamma_j \nabla_x g_j(x) + \xi \\ \text{diag}(\gamma)(g(x)) \end{pmatrix}$$

where a vector  $g$  is understood as a stacked version of  $g_j$ 's. Due to the SC and LICQ conditions, the solution of  $H(x, \xi, \gamma) = 0$  satisfies the KKT condition for  $(P_\xi)$ : i.e.,  $H(\bar{x}(\xi), \xi, \bar{\gamma}(\xi)) = 0$  where  $\bar{\gamma}(\xi)$  is the corresponding multipliers. Now by the classical implicit function theorem [e.g., 11, Theorem 1B.1] and the local stability result [51, Theorem 4.4], there always exists a neighborhood  $\mathbb{B}_{\bar{r}}(0)$ , for some  $\bar{r} > 0$ , of  $\xi = 0$  such that  $\bar{x}(\xi)$  and its total derivative exist for  $\forall \xi \in \mathbb{B}_{\bar{r}}(0)$ . In particular, the derivative at  $\xi = 0$  is computed by

$$\nabla_\xi \bar{x}(0) = -\mathbf{J}_{x,\gamma} H(\bar{x}(0), 0, \bar{\gamma}(0))^{-1} [\mathbf{J}_\xi H(\bar{x}(0), 0, \bar{\gamma}(0))],$$

where in our case  $\bar{x}(0) = x^*$ ,  $\bar{\gamma}(0) = \gamma^*$ , and thus

$$\mathbf{J}_{x,\gamma} H(\bar{x}(0), 0, \bar{\gamma}(0)) = \begin{bmatrix} \nabla_x^2 f(x^*) + \sum_j \gamma_j^* \nabla_x^2 g_j(x^*) & \mathbf{B}(x^*) \\ \mathbf{B}^\top(x^*) & 0 \end{bmatrix},$$

with  $\mathbf{B} = [\nabla_x g_j(x^*)^\top, j \in J_0(x^*)]$ , and

$$\mathbf{J}_\xi H(\bar{x}(0), 0, \bar{\gamma}(0)) = \begin{bmatrix} \mathbf{1} \\ \mathbf{0} \end{bmatrix}.$$

Here the inverse of  $\mathbf{J}_{x,\gamma} H(\bar{x}(0), 0, \bar{\gamma}(0))$  always exists (see Still [51, Ex 4.5]). Therefore we obtain that

$$D_0 \bar{x}(n^{1/2} \xi) = \begin{bmatrix} \nabla_x^2 f(x^*) + \sum_j \gamma_j^* \nabla_x^2 g_j(x^*) & \mathbf{B}(x^*) \\ \mathbf{B}^\top(x^*) & \mathbf{0} \end{bmatrix}^{-1} \begin{bmatrix} \mathbf{1} \\ \mathbf{0} \end{bmatrix} n^{1/2} \xi.$$

Finally, if  $n^{1/2} \xi \xrightarrow{d} \Upsilon$ , by Slutsky's theorem it follows

$$n^{1/2} (\hat{x} - x^*) \xrightarrow{d} \begin{bmatrix} \nabla_x^2 f(x^*) + \sum_j \gamma_j^* \nabla_x^2 g_j(x^*) & \mathbf{B}(x^*) \\ \mathbf{B}^\top(x^*) & \mathbf{0} \end{bmatrix}^{-1} \begin{bmatrix} \mathbf{1} \\ \mathbf{0} \end{bmatrix} \Upsilon.$$

□

Then, the desired result for Theorem 4.2 immediately follows by the fact that

$$\nabla_\beta \mathcal{L} = -\mathbb{E} \{ Y^a(Z; \eta) h_1(V, \beta) + (1 - Y^a) h_0(V, \beta) \}$$

where

$$h_1(V, \beta) = \frac{1}{\log \sigma(\beta^\top \mathbf{b}(V))} \mathbf{b}(V) \sigma(\beta^\top \mathbf{b}(V)) \{1 - \sigma(\beta^\top \mathbf{b}(V))\},$$

$$h_0(V, \beta) = -\frac{1}{\log(1 - \sigma(\beta^\top \mathbf{b}(V)))} \mathbf{b}(V) \sigma(\beta^\top \mathbf{b}(V)) \{1 - \sigma(\beta^\top \mathbf{b}(V))\},$$

followed by applying Lemma A.1.
